# Supplementary material for: Chemoprevention of Lung Carcinogenesis by Dietary Nicotinamide and Inhaled Budesonide
Source: Oxford University Press journal article supplement (doi:10.1158/1940-6207.capr-17-0402), 2019-01-03
Supplement: 19406207capr170402-sup-193646_2_supp_5040027_pf9jfq.docx [file 19406207capr170402-sup-193646_2_supp_5040027_pf9jfq.docx]

Supplemental Figure 1
